# Supplementary material
Source: PubMed Central journal article supplement (PMC7416774)
Supplement: NIHMS1615367-supplement-Supplementary_Material.pdf [file NIHMS1615367-supplement-Supplementary_Material.pdf]

Supplementary Table (Reference Group: Formal Care Only)

Table 1. Individual and County Predictors Associated with Informal and Formal Care in Rural Appalachian Counties of Virginia

|                                                             | No Care<br>vs.<br>Formal Care<br>Only | Informal Care<br>vs.<br>Formal Care<br>Only | Formal and<br>Informal Care<br>vs.<br>Formal Care Only |
|-------------------------------------------------------------|---------------------------------------|---------------------------------------------|--------------------------------------------------------|
|                                                             | <i>RR (Robust SE)</i>                 | <i>RR (Robust SE)</i>                       | <i>RR (Robust SE)</i>                                  |
| <b>Individual-Level Predictors</b>                          |                                       |                                             |                                                        |
| <u>Predisposing</u>                                         |                                       |                                             |                                                        |
| Age category                                                |                                       |                                             |                                                        |
| 65-79 ( <i>Ref.</i> )                                       |                                       |                                             |                                                        |
| 80 and older                                                | 0.44 (0.23)                           | 0.86 (0.39)                                 | 0.88 (0.35)                                            |
| Sex                                                         |                                       |                                             |                                                        |
| Male ( <i>Ref.</i> )                                        |                                       |                                             |                                                        |
| Female                                                      | 3.36 (1.38) **                        | 2.23 (1.03) †                               | 0.97 (0.52)                                            |
| Education                                                   |                                       |                                             |                                                        |
| Grade school completion or less ( <i>Ref.</i> )             |                                       |                                             |                                                        |
| Postsecondary education                                     | 0.43 (0.24)                           | 0.30 (0.15) **                              | 0.73 (0.44)                                            |
| High school diploma/GED                                     | 1.02 (0.47)                           | 1.18 (0.60)                                 | 1.08 (0.94)                                            |
| Some high school                                            | 0.82 (0.35)                           | 1.00 (0.42)                                 | 0.82 (0.50)                                            |
| <u>Enabling</u>                                             |                                       |                                             |                                                        |
| Belief in filial responsibility                             | 1.85 (0.63) †                         | 1.59 (0.49)                                 | 2.23 (0.80) *                                          |
| Attitude towards Community Services                         | 0.57 (0.57)                           | 0.44 (0.25)                                 | 1.44 (1.22)                                            |
| <u>Need</u>                                                 |                                       |                                             |                                                        |
| Functional Limitations                                      |                                       |                                             |                                                        |
| Only instrumental limitations ( <i>Ref.</i> )               |                                       |                                             |                                                        |
| Physical limitations regardless of instrumental limitations | 1.26 (0.54)                           | 1.25 (0.53)                                 | 3.75 (1.58) **                                         |
| <b>Microsystem: Social Context</b>                          |                                       |                                             |                                                        |
| Availability of kin                                         |                                       |                                             |                                                        |
| Married, with or without living children ( <i>Ref.</i> )    |                                       |                                             |                                                        |
| Not currently married, living with someone                  | 0.95 (0.84)                           | 1.36 (0.97)                                 | 2.64 (1.40) †                                          |

|                                                                                    | No Care<br>vs.<br>Formal Care<br>Only | Informal Care<br>vs.<br>Formal Care<br>Only | Formal and<br>Informal Care<br>vs.<br>Formal Care Only |
|------------------------------------------------------------------------------------|---------------------------------------|---------------------------------------------|--------------------------------------------------------|
|                                                                                    | <i>RR (Robust SE)</i>                 | <i>RR (Robust SE)</i>                       | <i>RR (Robust SE)</i>                                  |
| <i>Lives alone, has living children</i>                                            | 0.84 (0.68)                           | 0.53 (0.35)                                 | 1.51 (0.78)                                            |
| <i>Lives alone, no living children</i>                                             | 0.13 (0.13) *                         | 0.22 (0.17) *                               | 0.78 (0.62)                                            |
| <b>Macrosystem: County-Level Predictors</b>                                        |                                       |                                             |                                                        |
| 65+ population who are community dwelling with a disability (%)                    | 0.99 (0.02)                           | 1.02 (0.03)                                 | 1.02 (0.03)                                            |
| Total population age 65+ (%)                                                       | 1.09 (0.06)                           | 1.06 (0.06)                                 | 1.03 (0.05)                                            |
| 65+ population who are at or below poverty level (%)                               | 0.99 (0.07)                           | 1.00 (0.09)                                 | 1.01 (0.07)                                            |
| Personal property and real estate tax rate (per \$100 assessed value) <sup>a</sup> | 1.03 (0.35)                           | 1.42 (0.51)                                 | 1.55 (0.49)                                            |
| Total LTSS catering to older adults                                                | 1.00 (0.06)                           | 1.07 (0.07)                                 | 1.04 (0.06)                                            |
| Constant                                                                           | 0.53 (2.13)                           | 1.56 (6.90)                                 | 0.01 (0.02)                                            |
| <b>Interaction Effects</b>                                                         |                                       |                                             |                                                        |
| Functional Limitations × Percentage of 65+ at or below Poverty                     |                                       |                                             |                                                        |
| <i>Only instrumental limitations (Ref.)</i>                                        |                                       |                                             |                                                        |
| <i>Physical limitations regardless of instrumental limitations</i>                 | 0.81 (0.06) **                        | 0.92 (0.08)                                 | 1.03 (0.07)                                            |
| Sex × Percentage of 65+ at or below Poverty                                        |                                       |                                             |                                                        |
| <i>Male (Ref.)</i>                                                                 |                                       |                                             |                                                        |
| <i>Female</i>                                                                      | 1.29 (0.07) **                        | 1.02 (0.06)                                 | 1.01 (0.09)                                            |
| Age Categories × Percentage of 65+ at or below Poverty                             |                                       |                                             |                                                        |
| <i>65-79 (Ref.)</i>                                                                |                                       |                                             |                                                        |
| <i>80 and older</i>                                                                | 0.86 (0.06) *                         | 0.90 (0.04) *                               | 0.93 (0.06)                                            |
| Belief in Filial Responsibility × Total LTSS in county                             | 0.77 (0.06) **                        | 0.84 (0.06) *                               | 0.86 (0.06) *                                          |

Note: † $p < 0.10$  \* $p < 0.05$  \*\* $p < 0.01$  <sup>a</sup>log transformed; Ref.=Reference group; RR=Risk Ratio; Robust SE = Robust Standard Error
